Development 138, 4843-4852 (2011) doi:10.1242/dev.070284  
 © 2011. Published by The Company of Biologists Ltd

# Lhx2 differentially regulates Sox9, Tcf4 and Lgr5 in hair follicle stem cells to promote epidermal regeneration after injury

Andrei N. Mardaryev<sup>1</sup>, Natalia Meier<sup>2</sup>, Krzysztof Poterlowicz<sup>1</sup>, Andrey A. Sharov<sup>3</sup>, Tatyana Y. Sharova<sup>3</sup>, Mohammed I. Ahmed<sup>1</sup>, Valentina Rapisarda<sup>1</sup>, Christopher Lewis<sup>1</sup>, Michael Y. Fessing<sup>1</sup>, Thomas M. Ruenger<sup>3</sup>, Jag Bhawan<sup>3</sup>, Sabine Werner<sup>4</sup>, Ralf Paus<sup>2,5</sup> and Vladimir A. Botchkarev<sup>1,3,\*</sup>

## SUMMARY

The Lhx2 transcription factor plays essential roles in morphogenesis and patterning of ectodermal derivatives as well as in controlling stem cell activity. Here, we show that during murine skin morphogenesis, Lhx2 is expressed in the hair follicle (HF) buds, whereas in postnatal telogen HFs Lhx2<sup>+</sup> cells reside in the stem cell-enriched epithelial compartments (bulge, secondary hair germ) and co-express selected stem cell markers (Sox9, Tcf4 and Lgr5). Remarkably, Lhx2<sup>+</sup> cells represent the vast majority of cells in the bulge and secondary hair germ that proliferate in response to skin injury. This is functionally important, as wound re-epithelization is significantly retarded in heterozygous *Lhx2* knockout (+/-) mice, whereas anagen onset in the HFs located closely to the wound is accelerated compared with wild-type mice. Cell proliferation in the bulge and the number of Sox9<sup>+</sup> and Tcf4<sup>+</sup> cells in the HFs closely adjacent to the wound in *Lhx2*<sup>+/-</sup> mice are decreased in comparison with wild-type controls, whereas expression of Lgr5 and cell proliferation in the secondary hair germ are increased. Furthermore, acceleration of wound-induced anagen development in *Lhx2*<sup>+/-</sup> mice is inhibited by administration of *Lgr5* siRNA. Finally, Chip-on-chip/ChIP-qPCR and reporter assay analyses identified *Sox9*, *Tcf4* and *Lgr5* as direct Lhx2 targets in keratinocytes. These data strongly suggest that Lhx2 positively regulates *Sox9* and *Tcf4* in the bulge cells, and promotes wound re-epithelization, whereas it simultaneously negatively regulates *Lgr5* in the secondary hair germ and inhibits HF cycling. Thus, Lhx2 operates as an important regulator of epithelial stem cell activity in the skin response to injury.

**KEY WORDS:** Skin, Stem cells, Wound healing

## INTRODUCTION

Skin development is governed by interactions between the epithelium and mesenchyme, which result in formation of the epidermis and a number of skin appendages, including hair follicles (HFs) (Driskell et al., 2011; Fuchs, 2007; Schmidt-Ullrich and Paus, 2005). During postnatal life, epidermis and HFs self-renew and regenerate with an involvement of stem cells that are capable of differentiating into distinct epithelial cell lineages (Ambler and Maatta, 2009; Blanpain and Fuchs, 2009; Cotsarelis, 2006; Watt and Jensen, 2009). Epithelial stem cells also contribute to epidermal regeneration after injury, a complex process that includes tightly regulated recruitment of undifferentiated progenitor cells to the wound epithelium (Gurtner et al., 2008; Lau et al., 2009; Schafer and Werner, 2007).

The HF is an important source of epithelial stem cells, which are capable of generating daughter cells that re-build epithelial hair bulb during the hair cycle or migrate to the wound epithelium and promote the regenerative process (Cotsarelis et al., 1990; Ghazizadeh and Taichman, 2001; Hsu et al., 2011; Ito et al., 2005; Ito et al., 2007;

Kasper et al., 2011; Langton et al., 2008; Levy et al., 2005; Levy et al., 2007; Snippert et al., 2010; Taylor et al., 2000). HFs contain several populations of epithelial stem cells, each characterized by distinct, yet partially overlapping, expression patterns of surface receptors (Cd34, Cd71, Cd200, Lgr5, Lgr6, Lrig1, Sca-1), cytoskeletal proteins (keratins 15 and 19), signalling/transcriptional regulators (Lhx2, Sox9, Tcf3/4, Nfatc1, Gli-1) and epigenetic markers (Blanpain et al., 2004; Brownell et al., 2011; Frye et al., 2007; Garza et al., 2011; Horsley et al., 2008; Jaks et al., 2008; Jensen et al., 2009; Jensen et al., 2008; Morris et al., 2004; Nguyen et al., 2009; Nowak et al., 2008; Rhee et al., 2006; Snippert et al., 2010; Trempus et al., 2007; Tumber et al., 2003).

In normal skin, distinct populations of epithelial stem cells residing in the bulge, secondary hair germ or infundibulum of the HFs differentially contribute to the renewal of the epidermis versus the regeneration of the HF during the hair cycle (Ito et al., 2005; Jaks et al., 2008; Jensen et al., 2009; Li and Clevers, 2010). However, wounding perturbs homeostasis, resulting in activation of those populations of epithelial stem cells that normally supply progenies only into the HF during hair cycling (Ito et al., 2005; Kasper et al., 2011; Levy et al., 2007). Although HFs are not absolutely required for skin regeneration after injury, re-epithelization in hair-bearing skin occurs faster and more efficiently when compared with non-hair-bearing areas (Ansell et al., 2011; Ito and Cotsarelis, 2008; Langton et al., 2008; Romagosa et al., 2008).

The Lim-homeodomain transcription factor Lhx2 is an important regulator controlling the switch between stem cell maintenance and activation in the HFs (Rhee et al., 2006; Tiede and Paus, 2006;

<sup>1</sup>Centre for Skin Sciences, School of Life Sciences, University of Bradford, UK.

<sup>2</sup>Department of Dermatology, University of Lübeck, Germany. <sup>3</sup>Department of Dermatology, Boston University School of Medicine, Boston, MA, USA. <sup>4</sup>Department of Biology, Institute of Cell Biology, Swiss Federal Institute of Technology (ETH), Zürich, Switzerland. <sup>5</sup>School of Translational Medicine, University of Manchester, UK.

\* Author for correspondence (v.a.botchkarev@bradford.ac.uk; vladbotc@bu.edu)

Tornqvist et al., 2010). *Lhx2* is expressed in the bulge and hair germ of mouse telogen (resting) HF, and *Lhx2* deficiency in mice leads to incapability in maintaining a quiescent state in the bulge stem cells (Rhee et al., 2006). In human HFs, *Lhx2* shows more broad expression patterns and, in addition to the bulge cells, is seen in the isthmus, the infundibulum and the lower outer root sheath (Klopper et al., 2008). In other organs (eye, pituitary gland, limb, brain, hematopoietic system), *Lhx2* operates as a central link in the genetic networks that coordinate multiple signalling pathways controlling organ development and cell fate determination, as well as stem cell maintenance, differentiation and self-renewal (Chou et al., 2009; Dahl et al., 2008; Hirota and Mombaerts, 2004; Porter et al., 1997; Tetreault et al., 2009; Yun et al., 2009).

Despite the advantages in identification of distinct stem cell populations in the skin achieved during past few years (Blanpain and Fuchs, 2009; Watt and Jensen, 2009), regulatory mechanisms involved in controlling their activity and expression of stem cell markers (membrane receptors, cytoskeleton components, transcription factors) during their transition towards the epidermal or HF cell lineages in normal and injured skin are still unclear. In addition, the mechanisms underlying differential involvement of these stem cell populations in the control of distinct types of the regenerative processes in the epithelial tissues (epidermal regeneration after injury, physiological or wound-induced hair follicle cycling) remain to be elucidated.

Here, we show that *Lhx2* plays an important role as a switchboard regulator of the activity of distinct epithelial stem cell populations in the HF during wound healing. In particular, we demonstrate that *Lhx2* promotes wound re-epithelization via positive regulation of *Sox9*, and *Tcf4*, while simultaneously inhibiting HF cycling via negative regulation of *Lgr5*. Thus, *Lhx2* serves as a key factor integrating signalling and transcriptional networks that modulate activity of the HF stem cells during epidermal regeneration after injury.

## MATERIALS AND METHODS

### Animal experiments

All animal experiments were performed under the Home Office Project License (University of Bradford, UK). *Lhx2*<sup>+/-</sup> mice (Porter et al., 1997) were crossbred to obtain homozygous *Lhx2*<sup>-/-</sup> and wild-type embryos, which were collected on embryonic day 16.5 (E16.5), as described before (Botchkarev et al., 1999a). A full-thickness 3 mm wound was introduced by punch biopsy onto back skin of 8-week-old *Lhx2*<sup>+/-</sup> and wild-type mice at the telogen stage of the hair cycle (8-10 female mice of each strain per time point, one wound per mouse). *Lgr5* siRNA or control siRNA (Dharmacon, Chicago, IL) were injected into the wounds of *Lhx2*<sup>+/-</sup> mice at a concentration of 20  $\mu$ M as described previously (Mardaryev et al., 2010). siRNA treatment was performed on days 1-6 after wound infliction, and skin samples were collected on day 7 of the experiment. In each experiment, at least 4-5 mice per time point were used for analyses in both experimental and control groups. Samples of the skin closely (within 5 mm) and distantly located to the wound edge were collected at days 0, 1, 3 and 5 after wounding and were snap-frozen in liquid nitrogen.

### Human skin biopsies and wound healing organ culture assay

Biopsies of human skin with chronic wounds after diagnostic skin surgery and scalp skin of patients undergoing elective cosmetic surgery were obtained after informed consent and Ethics Committee Approval according to the Helsinki Ethical Guidelines for medical research involving human subjects. For skin organ culture, 2 mm punches were cut into full-thickness skin samples from patients. Then, 4 mm punches were set in the skin surrounding each 2 mm hole to obtain 'punch within a punch' skin samples (Moll et al., 1998). Samples were frozen immediately for analysis (day 0) or transferred to six-well plates containing Williams E culture medium

supplemented with insulin and hydrocortisone (Philpott et al., 1990; Lu et al., 2007). Each well contained two skin punches in 3 ml medium. After 48 hours the incubation medium was changed, and skin punches from each experimental condition were frozen at day 3. All experiments were performed in triplicates.

### Microarray and qRT-PCR analyses

Total RNA was isolated from snap-frozen tissue samples using miRNeasy kit (Qiagen, Hilden, Germany). For microarray analysis, 0.5  $\mu$ g of total RNA was processed for one-round amplification using RiboAmp RNA Amplification Kit (Molecular Devices, Sunnyvale, CA). mRNA microarray analysis was performed by Mogene (St Louis, MO) using 41K Whole Mouse Genome 60-mer oligo-microarray (manufactured by Agilent Technologies). For qRT-PCR, 1  $\mu$ g of total RNA was converted into cDNA using Reverse Transcription System (Promega, Madison, WI). Gene expression was performed on a MyiQ single-colour real-time PCR detection system (Bio-Rad, Hercules, CA) using PerfeCta SYBR Green FastMix for iQ (Quanta BioSciences, Gaithersburg, MD), as described previously (Sharov et al., 2003). PCR primers were designed using the Beacon Designer software (Premier Biosoft International, Palo Alto, CA; supplementary material Table S2). Differences between samples were calculated using the Genex database software (Bio-Rad) based on the Ct ( $\Delta\Delta C_t$ ) equitation method and normalized to the house-keeping gene *Gapdh*. Data from triplicates were pooled, mean $\pm$ s.e.m. was calculated, and statistical analysis was performed using unpaired Student's *t*-test. Microarray data have been deposited in the Gene Expression Omnibus database (Accession Numbers GSE32511 and GSE32514).

### Chip-on-chip and Chip-qPCR

Mouse embryonic, neonatal and adult epidermal keratinocytes were isolated from E16.5 embryos, 2- to 3-day-old and 8-week-old FVB mice, respectively, as described previously (Sharov et al., 2006) with modifications. Single cell suspensions were prepared after overnight digestion in 0.25% trypsin (Invitrogen) and epidermal separation. Cells were dual cross-linked with 2 mM disuccinimidyl glutarate (DSG) for 45 minutes and then in 1% paraformaldehyde for 15 minutes at room temperature as described previously (Nowak et al., 2005). Fixed cells were lysed in 10 ml of Lysis Buffer 1 [50 mM HEPES (pH 7.5), 140 mM NaCl, 1 mM EDTA, 0.1% IGEPAL 630 (Sigma-Aldrich)], containing 0.05% Triton X100, 2.5% glycerol and supplemented with 1 $\times$  protease inhibitor cocktail (Roche, Rotkreuz, Switzerland) for 10 minutes on ice, followed by incubation in Buffer 2 [0.1 M Tris HCl (pH 8) and 200 mM NaCl with protease inhibitors] for 15 minutes at room temperature. Chromatin was sonicated at 30% of amplitude for 10 minutes on a Branson Sonifier 450 (Branson Ultrasonics, Danbury, CT) using a cup horn. The samples were centrifuged (2 $\times$ 14,000 *g* for 5 minutes each), and soluble chromatin was transferred to a fresh tube. Crosslinked DNA after sonication was precipitated with 5  $\mu$ g of anti-*Lhx2* antibody (C-20, sc-19344, Santa Cruz, Santa Cruz, CA) or non-immune goat IgG (Vector Laboratories, Burlingame, CA) overnight at 4°C. Chromatin/antibody complex was pulled down with Dynal Protein G magnetic beads (Invitrogen, Carlsbad, CA) and washed in the low- and high-salt buffers. After de-crosslinking (65°C for 4 hours) and Proteinase K treatment, chromatin was purified by phenol-chloroform extraction and ethanol precipitation. Precipitated DNA after one round of amplification (WGA2, Sigma) was processed with NimbleGen MM8 Deluxe Promoter HX1 array (Mogene, St Louis, MO), or was analyzed by qPCR using primers generated for predicted *Lhx2* binding sites (supplementary material Table S2). ChIP-qPCR data were pooled, mean $\pm$ s.e.m. was calculated, and statistical analysis was performed using Student's *t*-test.

### Reporter assay

*Lhx2* expressing plasmid (pLhx2) was generated by subcloning the mouse *Lhx2* cDNA from an I.M.A.G.E. clone (6413339, Gene Service Ltd, UK) into the pCMV-SPORT6 vector (Invitrogen) at *Sall* and *NotI* sites. pSox9-luc construct (also known as pGL6.8-luc) bearing -6.8 kb promoter region of the mouse *Sox9* gene was kindly provided by Dr P. Koopman (Kanai and Koopman, 1999). To generate a *Tcf4* reporter construct, the *Tcf4* promoter region (-3598/+462) was PCR amplified from mouse genomic

DNA with Advantage HD DNA polymerase (Clontech) using the following primers (*Bg*III and *Hind*III restriction sites are underlined): 5'-CCCGGGCTCGAGATCTTGACCACACCCACCACCTT-3' (F) and 5'-CCGGAATGCCAAGCTTGCATTTTTCACCCACCAGCAGC-3' (R). The purified fragment was then cloned into pGl3-basic vector (Promega) at *Bg*III and *Hind*III sites using In-Fusion HD Cloning System (Clontech, Mountain View, CA). For reporter assay, HaCaT cells were seeded into 96-well plates ( $10^4$  cells per well) 1 day before transfection. Cells were co-transfected with pLhx2 or pCDN3 plasmids (120 ng/well) along with one of the reporter constructs (pSox9-Luc or pTcf4-Luc; 80 ng/well) using Lipofectamine 2000 (0.5  $\mu$ l/well) (Invitrogen). After 48 hours, reporter activity was detected using the Dual-Glo Luciferase Assay System (Promega) on Infinite 200 PRO microplate reader (Tecan, Männedorf, Switzerland). Two independent assays were performed in triplicates and results were normalized to the pnull-Renilla construct activity. Data were pooled, mean $\pm$ s.e.m. was calculated, and statistical analysis was performed using Student's *t*-test.

### Western blotting

Proteins were extracted from snap-frozen skin samples or cultured cells with lysis buffer as described previously (Sharov et al., 2005; Sharov et al., 2006). Protein (5  $\mu$ g) was processed for western blot analysis as described previously, followed by incubation with primary antibodies against Lhx2 [goat, 1:100, Santa Cruz (sc19344)] or *Lgr5* [rabbit, 1:100, Abcam (ab75732)] overnight at 4°C. Horseradish peroxidase-tagged IgG antibody was used as secondary antibody (1:5000; Thermo Scientific, Rockford, IL). Antibody binding was visualized using an enhanced chemiluminescence system (SuperSignal West Pico Kit, Thermo Scientific) followed by autoradiography with X-ray film (CL-Xposure Film, Thermo Scientific). Densitometric analysis was performed using Total Lab v1.10 software (Biogenetic, USA).

### Histology, histomorphometry and immunohistochemistry

For histological analyses, 8  $\mu$ m sections from the central parts of the wounds were stained with Hematoxylin-Eosin and photographed using an Eclipse 50i microscope equipped with a DS-C1 digital camera and ACT-2U image analysis software (Nikon, Tokyo, Japan). The length and area of the hyperproliferative wound epithelium were determined using the ImageJ software (<http://rsbweb.nih.gov/ij/>) as described previously (Kumin et al., 2007). Histomorphometry of the distinct hair cycle stages was performed on skin cryosections stained by alkaline phosphatase as described previously (Botchkarev et al., 1999b; Botchkareva et al., 2000).

For immunohistochemical analyses, cryosections were incubated with primary antisera against Lhx2, Sox9, Tcf4, *Lgr5*, Ki-67, Lef1, Krt16, Krt17, CD4, F4/80 and Ly-6G [CD4, rat, 1:100, Dako; F4/80, rat, 1:100, Dianova (T-2006); Ki-67, rabbit, 1:100, Abcam (ab15580); Krt14, rabbit, 1:200, Sigma (c-8791); Krt16, rabbit, 1:100, Abcam (ab76416); Krt17, rabbit, 1:5000, Abcam (ab53707); Lef1, rabbit, 1:100, Cell Signaling (C12A5); Lhx2, goat, 1:100, Santa Cruz (sc-19344); Ly-6G, rat, 1:150, BD Farmingen (551459); Sox9, rabbit, 1:100, Santa Cruz (sc20095); Tcf4, rabbit, 1:100, Cell Signaling (c48H11)] overnight at 4°C, followed by application of corresponding Alexa-488 and Cy-555-coupled secondary antibodies (Invitrogen; 1:200) for 60 minutes at 37°C, as described previously (Botchkareva et al., 2000). Image acquisition was performed on a Zeiss confocal microscope or a Nikon fluorescent microscope. Statistical analysis of the histomorphometric parameters and the number of Ki67<sup>+</sup> cells was performed using an unpaired Student's *t*-test or Mann-Whitney's test after the data from triplicate experiments were pooled and mean $\pm$ s.e.m. was calculated.

### In vitro migration assay

Primary keratinocytes from *Lhx2*<sup>+/-</sup> and *Lhx2*<sup>+/+</sup> mice were isolated as mentioned above and plated on collagen-coated dishes. Cells were grown at 33°C with 5% CO<sub>2</sub> until 100% confluency. Using a P10 tip, a scratch was made in the middle of the plate. The distance between leading edges of the migrating keratinocytes was measured using the ImageJ software, as described previously (Chmielowiec et al., 2007). Data from triplicates were pooled, mean $\pm$ s.d. was calculated, and statistical analysis was performed using unpaired Student's *t*-test.

## RESULTS

### Lhx2 ablation results in altered expression of stem cells markers in the skin

Lhx2 is one of the hair bud-specific markers, whereas in postnatal telogen HF Lhx2 is expressed in the bulge and secondary hair germ, the compartments enriched by epithelial stem cells (Rhee et al., 2006). To gain mechanistic insight into the role of Lhx2 in the regulation of the activity of epithelial stem cells, samples of total RNA isolated from E16.5 *Lhx2*<sup>+/-</sup> and wild-type embryos were processed for microarray analysis (Sharov et al., 2006). In addition, the formaldehyde-cross-linked chromatin fragments from primary epidermal keratinocytes were immunoprecipitated with anti-Lhx2 antibody, and ChIP-on-chip analysis was performed. Microarray and ChIP-on-chip data were merged, and 621 genes, the expression of which was significantly (two-fold and higher) changed in *Lhx2*<sup>+/-</sup> mice and showed association of Lhx2 with the corresponding promoter regions, were selected as the genuine Lhx2 targets in keratinocytes (Fig. 1A).

Interestingly, among the Lhx2 targets involved in the control of cell adhesion/extracellular matrix remodelling, metabolism, cytoskeleton, signalling and transcription, several genes were implicated in the control of stem cell activity (Fig. 1B; supplementary material Table S1). These included *Sox9*, *Tcf3* and *Tcf4*, which were downregulated in the *Lhx2*<sup>+/-</sup> mice, as well as *Lgr5*, which was upregulated (Fig. 1B, supplementary material Table S1). Alterations in the expression of these genes in *Lhx2*<sup>+/-</sup> versus wild-type mice were confirmed by qRT-PCR and immunohistochemistry (Fig. 1B,C). In particular, Sox9 and Tcf4 were not seen in the HF placodes in the embryonic *Lhx2*<sup>+/-</sup> skin, thus serving as an additional control for the microarray and ChIP-on-chip data (Fig. 1C). Interestingly, expression of Lef1, which is closely related to Tcf3 and Tcf4 (Nguyen et al., 2009; Nguyen et al., 2006), was not affected by the deletion of *Lhx2* (Fig. 1C). This is consistent with data demonstrating differential expression patterns and functional roles for Lef1 versus Tcf3/4 in the developing and postnatal skin (DasGupta and Fuchs, 1999; Merrill et al., 2001; Nguyen et al., 2009).

### Lhx2 expression is increased in the skin during wound healing

Regeneration of skin after injury includes not only re-epithelization of the epidermis, but also growth activation in the HF adjacent to the wound (Ansell et al., 2011; Ito and Cotsarelis, 2008; Langton et al., 2008; Romagosa et al., 2008). To determine a potential role of Lhx2 in wound repair, we first studied its expression in mouse skin at distinct time-points after wounding, as well as in human skin biopsies obtained from individuals with chronic wounds and in punch-wounded human skin cultured under serum-free conditions (Moll et al., 1998; Lu et al., 2007). In the skin of 8- to 9-week-old mice, levels of *Lhx2* transcripts increased on days 3 and 5 after application of full-thickness 3 mm wounds (Fig. 2A). Lhx2<sup>+</sup> cells showed a marked increase in their proliferation on days 3 and 5 after wounding (Fig. 2B,C). In both bulge and secondary hair germ of the HF adjacent to the wound more than 80% of proliferating cells were Lhx2<sup>+</sup> (Fig. 2C). However, similar to unwounded skin (Rhee et al., 2006), Lhx2<sup>+</sup> cells were seen only in the bulge and secondary hair germ of mouse HF adjacent to the wound, whereas lack of Lhx2 expression was seen in the infundibulum, interfollicular epidermis and wound epithelium (Fig. 2D).

In normal human skin, Lhx2 was expressed in the HF bulge and outer root sheath, whereas in the skin biopsies from chronic wounds, Lhx2<sup>+</sup> cells were seen in the wound edge epithelium and upper region of the infundibulum of the HF located closely to the



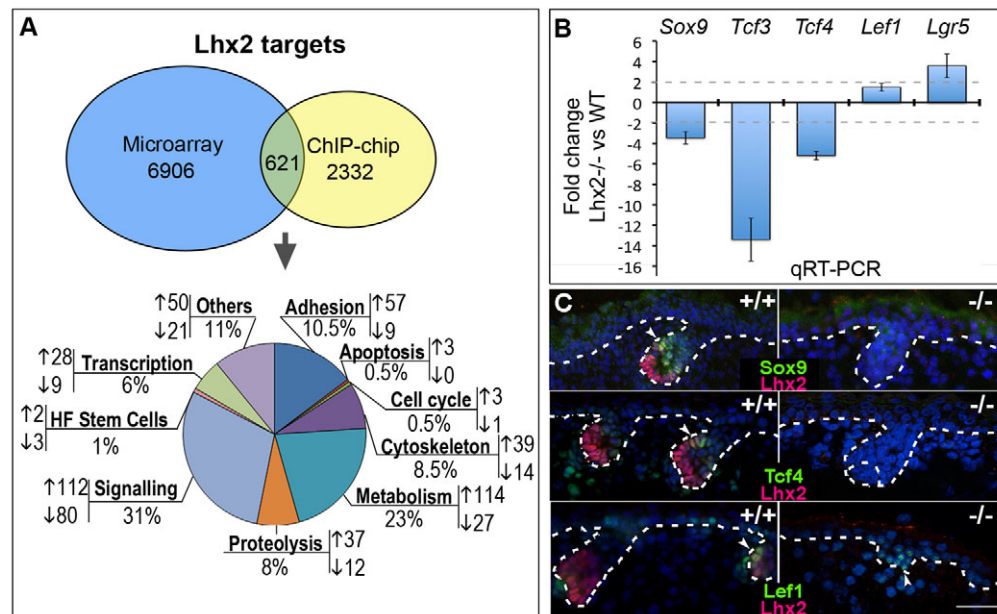

**Fig. 1. Altered expression of stem cell markers in the *Lhx2*-null skin.** E16.5 *Lhx2*<sup>-/-</sup> and wild-type embryos were processed for RNA extraction and subsequent microarray studies and qRT-PCR analyses, as well as for immunohistochemistry. Primary keratinocytes isolated from mouse back skin were processed for ChIP-on-chip analysis with an antibody against the *Lhx2* or purified goat IgG. (A) The ontology of the genes whose expression was altered in the E16.5 *Lhx2*<sup>-/-</sup> mice versus wild-type controls and which showed association of *Lhx2* with the corresponding promoter regions in ChIP-on-chip assay. Full list of the genes is shown in Table S1 (supplementary material). (B) qRT-PCR analysis of the stem cell markers and regulators of stem cell activity in the *Lhx2*<sup>-/-</sup> versus wild-type skin. Data are mean ± s.e.m. (C) Hair follicle buds of *Lhx2*<sup>-/-</sup> mice show lack of the Sox9- and Tcf4-positive cells, and presence of Lef1, which are all visible in wild-type mice (arrowheads). Borders between the epithelial and mesenchymal skin compartments are indicated by a broken line. Scale bar: 50 μm.

wound edge (Fig. 2E,G). In organ-cultured full-thickness fragments of normal human skin, the *Lhx2*<sup>+</sup> cells (expressing also keratin 14) were located in the bulge and outer root sheath of the HFs and their number was significantly ( $P < 0.05$ ) increased on day 3 after injury compared with unwounded skin (Fig. 2F,H,I).

### ***Lhx2* deficiency results in impaired wound repair and accelerated entry of the hair follicles into anagen**

To assess the role of *Lhx2* in the control of wound re-epithelization after injury, *Lhx2* heterozygous knockout (+/-) mice were used as a model (Porter et al., 1997). *Lhx2* knockout (-/-) mice die between E15.5 and E16.5 from abnormalities in the development of the liver, brain and hematopoietic system (Porter et al., 1997). *Lhx2*<sup>+/-</sup> mice were viable, fertile and showed ~50% decrease of *Lhx2* protein and mRNA levels in the skin compared with wild-type mice (Fig. 3A,B).

Histological and histomorphometric analysis of the skin sections at distinct time-points after wound infliction showed progressive alterations in the development of the hyperproliferative wound epithelium in *Lhx2*<sup>+/-</sup> mice compared with wild-type mice (Fig. 3C-E). Despite the fact that on day 3 after wounding the length and area of the hyperproliferative wound epithelium used as established parameters of the regenerative process (Kumin et al., 2007) were quite similar between wild-type and *Lhx2*<sup>+/-</sup> mice, both parameters were significantly reduced ( $P < 0.05$ ) in *Lhx2*<sup>+/-</sup> mice on day 5 after wounding compared to wild-type controls (Fig. 3C-E). Interestingly, on days 5-7 after wounding, HFs in *Lhx2*<sup>+/-</sup> mice located closely (within 5 mm) to the wound showed significantly more advanced anagen development compared with the HFs in

wild-type mice (Fig. 3F,G; supplementary material Fig. S1A), whereas no differences in hair cycle progression between *Lhx2*<sup>+/-</sup> and wild-type mice were seen in the HFs distantly located to the wounds (data not shown).

Analysis of cell proliferation in the distinct epithelial skin compartments (wound epithelium, interfollicular epidermis, HF infundibulum, bulge and secondary germ) on days 1-5 after wounding revealed significant differences between *Lhx2*<sup>+/-</sup> and WT mice only in the bulge and secondary hair germ of the HFs (Fig. 3H,I; supplementary material Fig. S1B). Interestingly, cell proliferation in the bulge of the HFs in *Lhx2*<sup>+/-</sup> mice was significantly lower ( $P < 0.05$ ) on day 3 after wounding compared with wild-type mice, whereas the number of Ki67<sup>+</sup> cells in the secondary hair germ was significantly higher ( $P < 0.001$ ) compared with wild-type mice at this time point (Fig. 3H,I). However, other parameters of the wound-healing process, such as expression of wound-associated keratins (Krt16, Krt17), presence of immune cells (macrophages, neutrophils, CD4<sup>+</sup> T cells) in the dermis/granulation tissue, as well as keratinocyte migration (as determined by scratch assay with cultured keratinocytes) were not changed in the *Lhx2*<sup>+/-</sup> versus wild-type mice (supplementary material Fig. S1C-H).

Thus, the impaired re-epithelization in *Lhx2*<sup>+/-</sup> mice was accompanied by inverse changes in cell proliferation in the bulge versus secondary hair germ and by more rapid development of anagen in the HFs adjacent to the wound (Fig. 3C-I). These data suggest that *Lhx2* differentially regulates the activity of those populations of the HF stem cells that respond to skin injury versus those that regulate HF cycling by supplying their progenies either into the wound epithelium or into the growing HF, respectively (Ito et al., 2005).

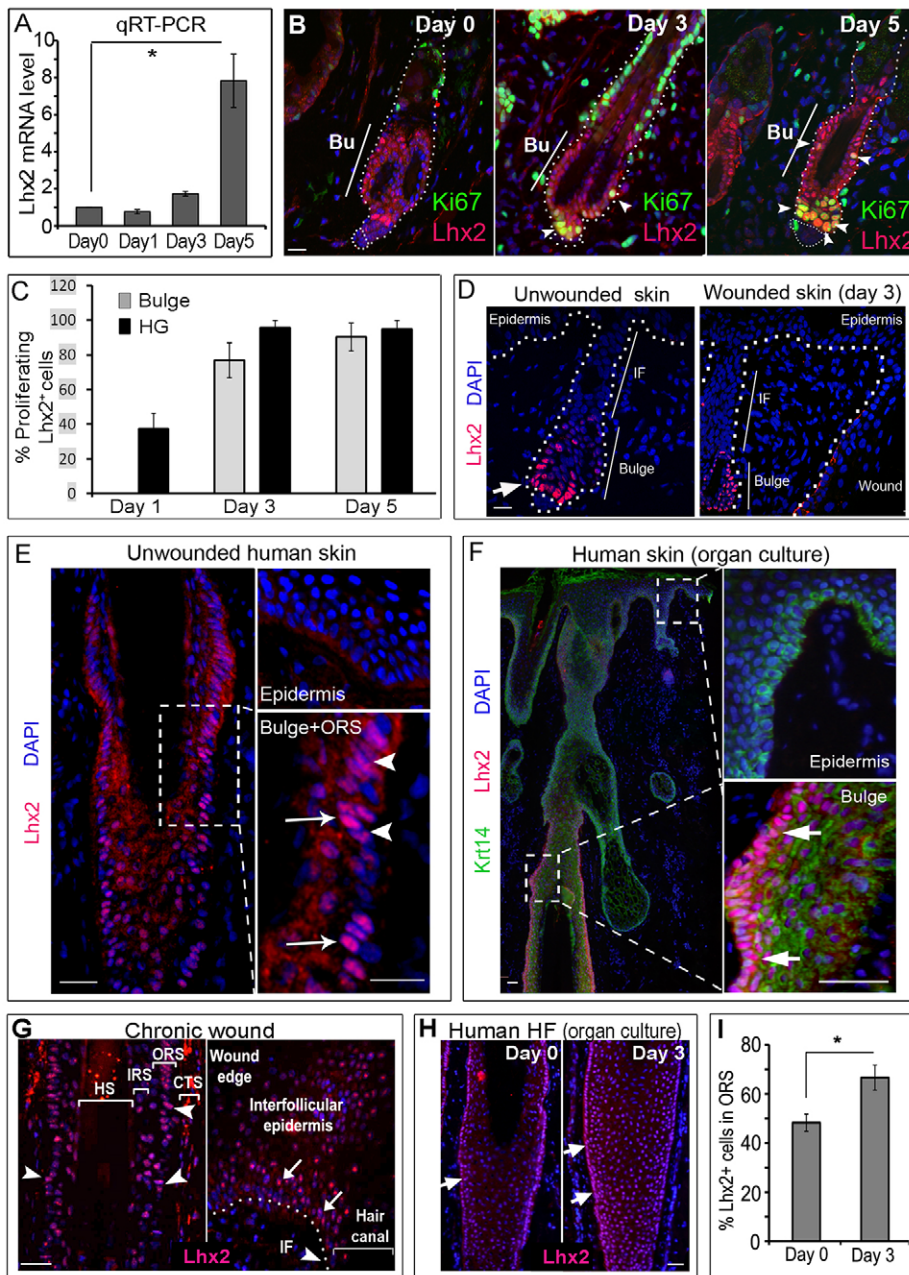

**Fig. 2. *Lhx2* expression increases in hair follicles during wound healing.** qRT-PCR for *Lhx2* was performed with RNA from mouse skin wounds at different days after wounding. Cryosections of the wounded human and mouse skin were immunolabelled with anti-*Lhx2* antiserum alone or together with anti-Ki-67 or CK14 antibody. In microscopic images, borders between the epidermis or HF and dermis are depicted by the broken line. **(A)** Increase in *Lhx2* transcripts in mouse skin 5 days after wounding (mean±s.e.m.; \* $P < 0.05$ , Student's *t*-test); **(B, C)** *Lhx2*<sup>+</sup> cells proliferate in response to skin wounding in mice. Double immunodetection shows localization of the proliferating *Lhx2*<sup>+</sup> cells in the hair germ and bulge of HF adjacent to the wound (B, arrowheads). The majority (>80%) of proliferating cells in the hair germ and bulge are *Lhx2* positive (C). Bu, bulge. Data are mean±s.e.m. **(D)** During wound healing, *Lhx2*<sup>+</sup> cells are seen only in the hair follicle bulge and secondary hair germ (arrow) and are absent in the wound epithelium. **(E)** In normal unwounded human skin, *Lhx2* shows nuclear (arrows) and cytoplasmic (arrowheads) expression only in the HF bulge and outer root sheath (bottom image, arrows), and is absent in the epidermis (upper image). **(F)** In organ cultures of human skin, *Lhx2*<sup>+</sup> cells that also expressed keratin 14 are seen in the bulge/outer root sheath (lower inset, arrows). Lack of *Lhx2* is seen in the epidermis (upper inset, arrow). **(G)** In the biopsies of chronic skin wounds, *Lhx2* is expressed in the wound edge epithelium and interfollicular epidermis (arrows), as well as in the follicular infundibulum (arrowheads). **(H, I)** Increase in the number of *Lhx2*<sup>+</sup> cells in the HF outer root sheath in organ cultured human skin after wounding (mean±s.e.m., \* $P < 0.05$ , Student's *t*-test). Arrows indicate *Lhx2*<sup>+</sup> cells in the outer root sheath. CTS, connective tissue sheath; HS, hair shaft; IF, infundibulum; IRS, inner root sheath; ORS, outer root sheath. Scale bars: 50  $\mu$ m; 25  $\mu$ m in insets.

### ***Lhx2* stimulates the expression of *Sox9*, *Tcf4* and inhibits *Lgr5* expression in hair follicle stem cells during wound healing**

Because, in mice, *Lhx2* was expressed exclusively in the bulge and secondary hair germ and was not seen in the follicular infundibulum, inter-follicular epidermis or wound epithelium (Fig. 2B,D), we hypothesized that *Lhx2* contributes to wound re-epithelization rather indirectly and most likely via regulation of *Sox9* and *Tcf4* in hair follicle stem cells. Genetic ablation of *Sox9* or *Tcf3/4* resulted in marked retardation of the wound-healing process (Nguyen et al., 2009; Nowak et al., 2008). In addition, *Sox9* and *Tcf3* proteins are ectopically expressed in the epidermis of K14-*Lhx2* transgenic mice, suggesting an involvement of *Lhx2* in the control of their expression in keratinocytes (Rhee et al., 2006).

In early anagen HF of unwounded adult mouse skin, *Sox9*<sup>+</sup> and *Tcf4*<sup>+</sup> cells were only seen in the bulge, but were absent in the follicular infundibulum (supplementary material Fig. S2A). In wounded skin, double immunolabelling of *Lhx2* with *Sox9* or *Tcf4* revealed their colocalization within the bulge area (Fig. 4A). However, in wounded skin *Sox9*<sup>+</sup> and *Tcf4*<sup>+</sup> cells were also seen in the follicular infundibulum (Fig. 4B), and these cells did not express *Lhx2* (data not shown). To assess whether *Lhx2* deficiency may affect the expression of *Sox9* and *Tcf4*, the number *Sox9*<sup>+</sup> and *Tcf4*<sup>+</sup> cells was compared in the HF adjacent to the wounds between the *Lhx2*<sup>+/-</sup> and wild-type mice. The percentage of *Sox9*<sup>+</sup> and *Tcf4*<sup>+</sup> cells was markedly decreased in the infundibulum but not in the bulge of the HF adjacent to the wound in *Lhx2*<sup>+/-</sup> mice versus wild-type controls (Fig. 4B,C; supplementary material Fig. S2B). Furthermore, qRT-PCR data showed significant decrease of the *Sox9*



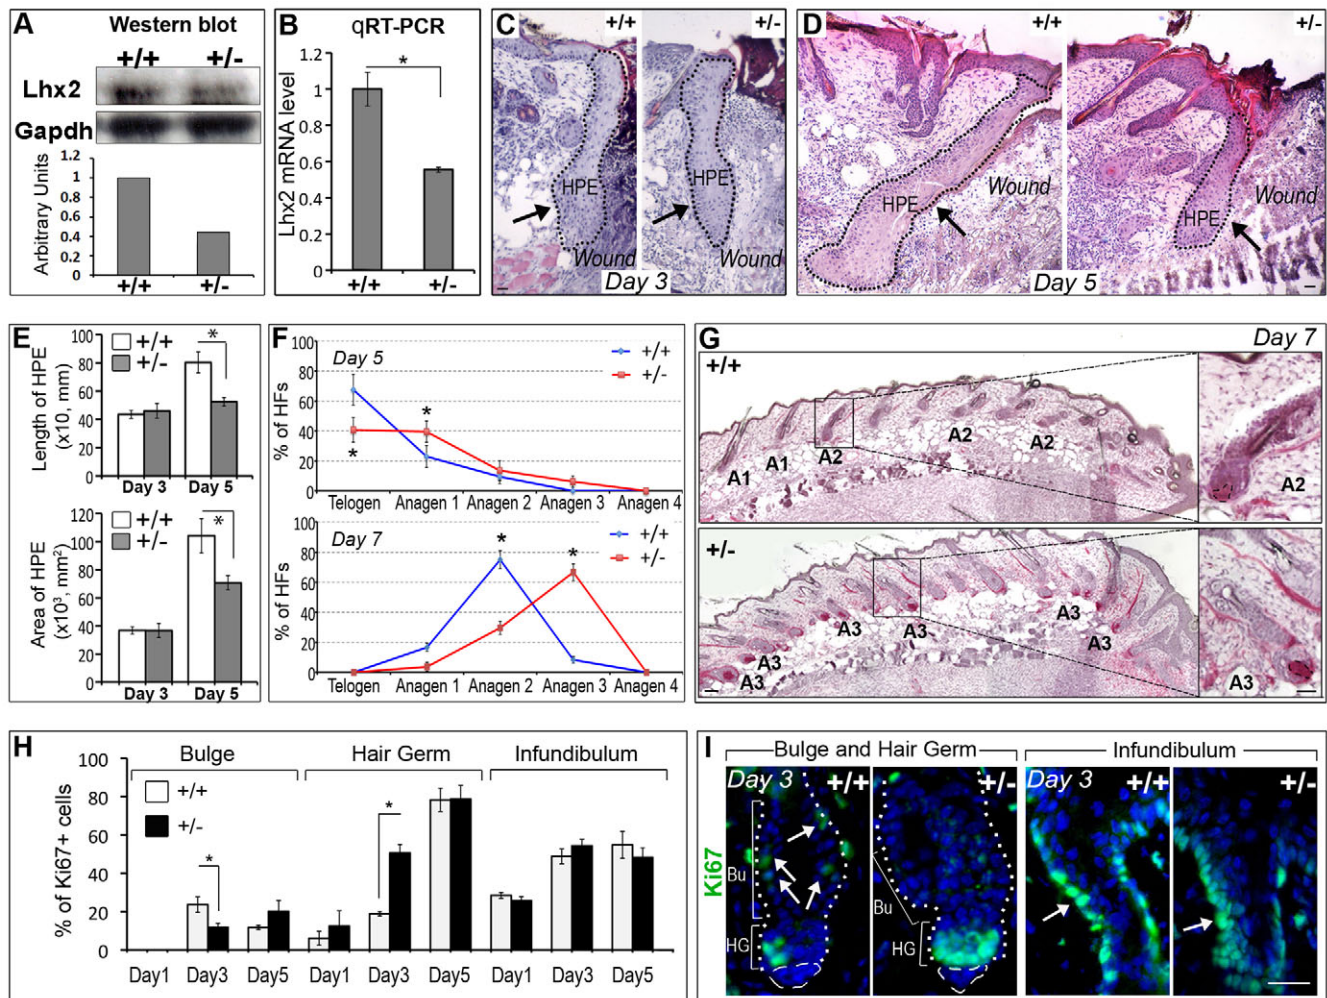

**Fig. 3. *Lhx2*<sup>+/-</sup> mice show impaired wound re-epithelization and accelerated anagen development associated with alterations of cell proliferation in the hair follicles.** Full-thickness wounds were introduced to back skin of 8-week-old wild-type (+/+) or *Lhx2* heterozygous (+/-) mice, and skin was collected at days 1-7 after wounding. Skin samples ( $n=8-10$  from each strain) from the central part of the wounds were processed for Hematoxylin and Eosin, alkaline phosphatase or Ki67 staining, and morphometric analyses. (A,B) Decrease in levels of *Lhx2* protein (A) and transcripts (B) in the skin of 8-week-old *Lhx2*<sup>+/-</sup> mice versus age-matched wild-type controls, as determined by western blot analysis (A) or qRT-PCR (B). Data are mean $\pm$ s.e.m. (C,D) Impaired development of the wound epithelium in *Lhx2*<sup>+/-</sup> skin on day 5 post wounding (D) compared with day 3 (C) and with corresponding wild-type controls. Broken line and arrows show the areas of hyper-proliferative epithelium (HPE). (E) Significantly reduced area and length of the hyper-proliferative epithelium (HPE) in the *Lhx2*<sup>+/-</sup> skin at day 5 after wounding versus the controls (mean $\pm$ s.e.m., \* $P<0.05$ ). (F,G) Acceleration of anagen development in the HFs located closely to the wounds in *Lhx2*<sup>+/-</sup> mice versus wild-type controls on days 5 and 7 after wound infliction (mean $\pm$ s.e.m., \* $P<0.05$ ). HFs at distinct stages of the hair cycle on day 7 of experiment are shown [G; T, telogen or resting stage; A1, anagen 1, a stage characterized by onset of keratinocyte proliferation resulted in the enlargement of secondary hair germ; A2, anagen 2, a stage characterized by partial incorporation of the dermal papilla into enlarged secondary hair germ; A3, a stage characterized by full incorporation of the dermal papilla into the forming hair bulb (see Muller-Rover et al., 2001)]. Images of the skin on day 5 of the experiment are shown in Fig. S1A (supplementary material). (H,I) Analysis of cell proliferation in distinct HF compartments (days 1-5 after wounding) shows inverse changes in the number of Ki67<sup>+</sup> cells in the bulge versus secondary hair germ of the HFs in *Lhx2*<sup>+/-</sup> mice compared with wild-type controls on day 3 after wound infliction (mean $\pm$ s.e.m., \* $P<0.05$ , Student's *t*-test). Number of Ki67<sup>+</sup> cells in the infundibulum (I, arrows) does not change between the *Lhx2*<sup>+/-</sup> mice and wild-type controls. Data on cell proliferation in the interfollicular epidermis and wound epithelium in *Lhx2*<sup>+/-</sup> and wild-type mice at distinct time-points after wounding are shown in Fig. S1B (supplementary material). Bu, bulge; HG, secondary hair germ. Scale bars: 50  $\mu$ m; 100  $\mu$ m in G (insets).

and *Tcf4* transcript levels in wounded skin of *Lhx2*<sup>+/-</sup> mice compared with wild-type controls, whereas no such changes were seen in unwounded skin (supplementary material Fig. S2C). These data suggest that *Lhx2* is indeed involved in regulating the expression of *Sox9* and *Tcf4* in the bulge progenitor cells during wound healing.

*Lgr5* also showed colocalization with *Lhx2* in the secondary hair germ (Fig. 4A). Furthermore, expression of *Lgr5* in the secondary hair germ, as well as *Lgr5* mRNA and protein levels were increased

in total skin of *Lhx2*<sup>+/-</sup> mice on day 5 after wounding compared with wild-type controls, but not in the unwounded skin (Fig. 4D-F; supplementary material Fig. S2C). Importantly, acceleration of anagen development in *Lhx2*<sup>+/-</sup> mice versus wild-type mice on day 7 after wounding was significantly ( $P<0.05$ ) inhibited by intracutaneous administration of *Lgr5* siRNA (Fig. 4G,H). *Lgr5* siRNA treatment also inhibited wound-associated anagen development in wild-type mice (data not shown). The efficient *Lgr5*

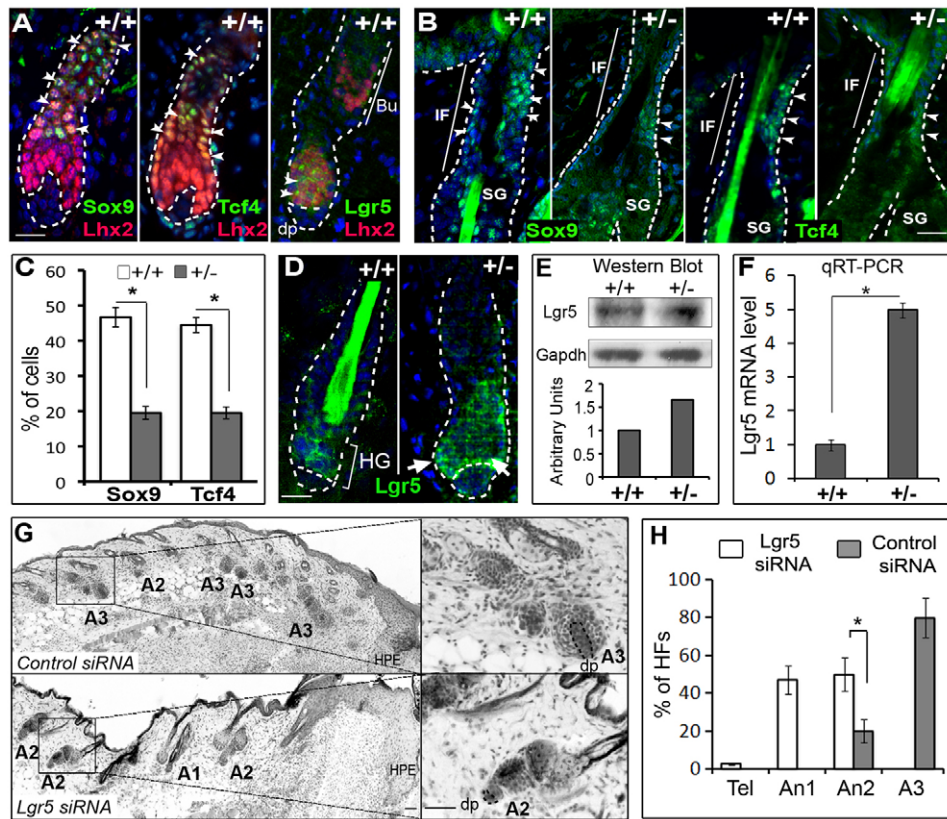

**Fig. 4. Interrelations between Lhx2 and Sox9, Tcf4 and Lgr5 in hair follicle progenitor cells during wound healing.** Skin of *Lhx2*<sup>+/-</sup> and wild-type mice at days 5-7 after wounding was processed for immunohistochemical detection of Lhx2 and/or Sox9, Tcf4, Lgr5 (A-D), as well as processed for detection of the Lgr5 proteins and transcripts by western blot and qRT-PCR (E,F). *Lhx2*<sup>+/-</sup> mice were treated with Lgr5 or control siRNA on days 1-6 after wound infliction, and skin was processed for histochemical detection of alkaline phosphatase and histomorphometry of hair cycle stages (G,H). (A) Co-expression of Lhx2 and/or Sox9, Tcf4 and Lgr5 in HF's of wild-type mice (arrowheads). Borders between the epidermis or HF and dermis are depicted by the broken line. (B,C) Immunodetection of the Sox9<sup>+</sup> and Tcf4<sup>+</sup> cells in the HF's of wild-type and *Lhx2*<sup>+/-</sup> mice 5 days after wounding. The percentage of Sox9<sup>+</sup> and Tcf4<sup>+</sup> cells (B, arrowheads) is reduced in the infundibulum of *Lhx2*<sup>+/-</sup> mice versus wild-type controls (C, mean±s.e.m., \**P*<0.05, Student's *t*-test). (D) Expression of Lgr5 increased in the secondary hair germ of the HF's in *Lhx2*<sup>+/-</sup> mice (arrows) compared with wild-type controls on day 5 after wounding. (E,F) Increase in expression of Lgr5 protein (E) and transcripts (F) in the skin of *Lhx2*<sup>+/-</sup> mice versus age-matched wild-type controls on day 5 after wounding, as determined by western blot analysis (E) or qRT-PCR (F) (mean±s.e.m., \**P*<0.05). (G,H) Inhibition of wound-induced anagen development and significant increase in the number of anagen 2 HF's and decrease of anagen 3 HF's on day 7 of experiment in *Lhx2*<sup>+/-</sup> mice after treatment with Lgr5 siRNA compared with control siRNA (mean±s.e.m., \**P*<0.05, Student's *t*-test). High magnifications of the HF's at distinct stages of the hair cycle are shown in the insets (G; T, telogen; A1-A3, anagen 1-3; dermal papilla of the HF's is depicted by a broken line). Data on the validations of the Lgr5 siRNA activity are shown in Fig. S2 (supplementary material). Bu, bulge; DP, dermal papilla; HF, secondary hair germ; IF, infundibulum; SG, sebaceous gland. Scale bars: 50 μm; 100 μm in G (insets).

knockdown was verified by the detection of significantly reduced levels of *Lgr5* transcripts in the skin, as well as of the levels of Lgr5 protein and mRNA in primary keratinocytes after *Lgr5* siRNA treatment (supplementary material Fig. S3A,B). These data suggest that Lhx2 inhibits wound-induced anagen development, at least in part, via negative regulation of Lgr5 expression in the HF progenitor cells residing in the secondary hair germ.

### Sox9, Tcf4 and Lgr5 are direct Lhx2 targets in keratinocytes

To further validate whether *Sox9*, *Tcf4* and *Lgr5* are indeed direct targets of Lhx2, MatInspector analysis (Cartharius et al., 2005) for putative Lhx2-binding sites was performed and revealed several AT-rich Lim-homeodomain DNA-binding sites within the promoter regions of the *Sox9*, *Tcf4* and *Lgr5* genes. To confirm the ChIP-on-chip data, we carried out ChIP-qPCR on chromatin samples isolated from keratinocytes of E16.5 embryos, newborn or adult mice (Fig.

5A,B; supplementary material Fig. S4). ChIP-qPCR analyses of newborn or adult keratinocytes showed Lhx2 association with chromatin at distinct sites in the genomic regions of the *Sox9*, *Tcf4* and *Lgr5* promoters. In all three promoters tested, several sites among the predicted binding regions showed distinct (from twofold to fourfold) degrees of enrichment of binding to anti-Lhx2 antibody versus controls (Fig. 5A,B). Lhx2 binding to the *Sox9* and *Tcf4* promoters was also seen in keratinocytes isolated from E16.5 embryos (supplementary material Fig. S4). However, in contrast to keratinocytes from newborn or adult mice, lack of Lhx2 binding to the *Lgr5* promoter was seen in E16.5 keratinocytes (supplementary material Fig. S4). This is consistent with low Lgr5 expression levels in embryonic skin (Jaks et al., 2008) and suggests that Lhx2 controls expression of *Lgr5* only in postnatal skin. However, there was no difference in precipitation with the anti-Lhx2 antibody of the control sites on each promoter compared with control IgG, thus serving as internal negative control for this assay (Fig. 5B).



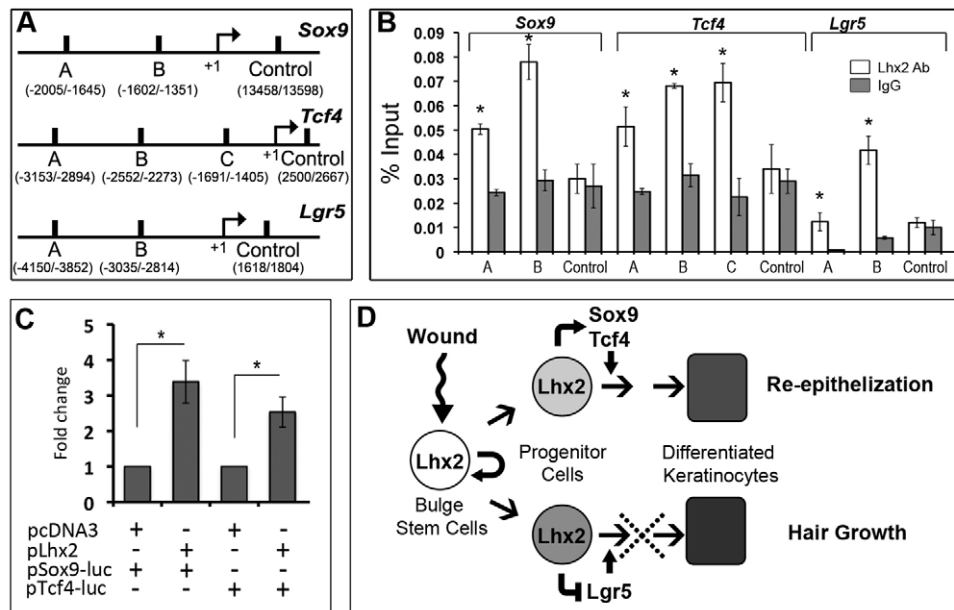

**Fig. 5. Lhx2 binds to the promoter regions of the *Sox9*, *Tcf4* and *Lgr5* genes in keratinocytes.** Mouse keratinocytes isolated from adult telogen skin were processed for ChIP-qPCR analysis with an antibody against Lhx2 or purified goat IgG. HaCaT keratinocytes were processed for detection of the *Sox9* and *Tcf4* promoter activities. (A) *Sox9*, *Tcf4* and *Lgr5* promoter regions with putative Lim-homeodomain DNA-binding sites or control sites predicted by bioinformatic analysis. (B) ChIP-qPCR analysis of the distinct regions in the *Sox9*, *Tcf4* and *Lgr5* promoters, showing enrichment with Lhx2 antibody compared with IgG controls (mean $\pm$ s.e.m.,  $n=3$ ; \* $P<0.05$ , Student's *t*-test). (C) HaCaT keratinocytes were transfected with the reporter plasmids containing mouse *Sox9* or *Tcf4* promoter fragments, as well as with Lhx2-containing vector or with pCDN3 control vector. Increase in the pSox9-Luc or pTcf4-Luc activities versus controls (mean $\pm$ s.e.m.,  $n=3$ ; \* $P<0.05$ , Student's *t*-test). (D) The involvement of Lhx2 in the control of the hair follicle response to skin injury.

To assess whether Lhx2 controls the activities of the *Sox9* and *Tcf4* promoters, HaCaT keratinocytes were transfected with the corresponding reporter plasmids containing mouse *Sox9* or *Tcf4* promoters, respectively. Cells were co-transfected with an Lhx2 expressing vector, which resulted in a 2.5- to 3.5-fold increase in pSox9-Luc or pTcf4-Luc activities when compared with control (Fig. 5C). These data suggested that Lhx2 positively regulates the activity of the both promoters. They are consistent with the results of microarray, ChIP-on-chip and immunohistochemical analyses (Figs 1, 4) and demonstrate that Lhx2 indeed controls the expression of these markers in distinct populations of HF progenitor cells during epidermal regeneration after injury.

## DISCUSSION

Skin repair after injury is a complex process, which involves recruitment of distinct populations of undifferentiated progenitor cells from adjacent HFs into regenerating epidermis (Blanpain and Fuchs, 2009; Cotsarelis, 2006; Gurtner et al., 2008; Lau et al., 2009). The data presented in this manuscript unravel a previously unrecognized role for Lhx2 in the promotion of epidermal regeneration after wounding and demonstrate that Lhx2 operates as one of the key regulators controlling the differential response of the distinct populations of the HF stem cells to skin injury.

We show that Lhx2<sup>+</sup> cells residing in the bulge and secondary hair germ of the HF represent the vast majority of cells that proliferate after skin injury in mice and expand in number in the HF outer root sheath in human skin (Fig. 2). This suggests a high degree of conservation of the molecular control of the wound healing response between humans and mice. Although the precise choreography of the molecular events by which Lhx2 impacts on epidermal regeneration in human skin remain to be defined, we

demonstrate here that in mice Lhx2 causes opposite effects on cell proliferation in the bulge and secondary hair germ and differentially regulates the activity of the distinct populations of the progenitor cells residing in these follicular compartments.

Because, in mice, Lhx2 is not expressed in the wound epithelium or interfollicular epidermis (Fig. 2), we hypothesize that it contributes to the wound-healing process rather indirectly and, at least in part, via positive regulation of *Sox9* and *Tcf4* in the bulge stem cells. *Sox9* and *Tcf4* transcription factors play essential roles in the control of HF morphogenesis and in the maintenance of the HF stem cells during postnatal life (Nguyen et al., 2009; Nowak et al., 2008), and Lhx2 co-localizes with these markers in the HF bulge (Fig. 4). Furthermore, lineage tracing experiments showed that bulge-derived *Sox9*<sup>+</sup> and *Tcf4*<sup>+</sup> progenitor cells contribute to wound re-epithelization, and genetic ablation of *Sox9* or *Tcf4* resulted in marked retardation of the wound-healing process (Nguyen et al., 2009; Nowak et al., 2008). ChIP-on-chip/ChIP-qPCR and reporter assay data presented here provide evidence that Lhx2 serves as a direct upstream regulator of *Sox9* and *Tcf4* and, most likely, promotes expansion of the *Sox9*<sup>+</sup> and *Tcf4*<sup>+</sup> progenitor cells towards the regenerating epidermis during the response of the skin to injury (Figs 4, 5).

In addition to the marked retardation of wound re-epithelization, *Lhx2*<sup>+/-</sup> mice show significant acceleration of anagen development in the HFs adjacent to the wounds (Fig. 3; supplementary material Fig. S1). We demonstrate here that Lhx2 negatively regulates the expression of *Lgr5* (Figs 4, 5), a marker of the cycling population of the HF stem cells predominantly residing in secondary hair germ and lower bulge, which is capable of generating all HF cell lineages during the hair cycle (Jaks et al., 2008). It has recently been shown that *Lgr5-lacZ*-expressing cells could also be seen in



the bulge and interfollicular epidermis at late stages of the healing process, suggesting their contribution to re-epithelization (Kasper et al., 2011). We show that *Lhx2* and *Lgr5* are co-expressed in the progenitor cells residing in secondary hair germ, that levels of *Lgr5* transcripts and protein are increased in the skin of *Lhx2*<sup>+/-</sup> mice, and that acceleration of the wound-induced anagen development in *Lhx2*<sup>+/-</sup> mice is inhibited by administration of *Lgr5* siRNA (Fig. 4). Together with the ChIP-on-chip and Chip-qPCR data (Fig. 5), these data strongly suggest that, during wound healing, *Lhx2* inhibits HF cycling, most likely via negative regulation of *Lgr5* in the progenitor cell population located in the secondary hair germ.

It has previously been shown that *Lhx2* operates as a transcriptional activator or repressor during development depending on the site, timing and levels of expression, as well as on the availability of distinct co-factors that form the *Lhx2* transcription complexes (Chou et al., 2009; Hobert and Westphal, 2000; Xu et al., 2007; Yun et al., 2009). Our data on the wound-induced acceleration of anagen development in *Lhx2*<sup>+/-</sup> mice are consistent with data showing accelerated entry of the HFs into anagen phase during the normal hair cycle in the *Lhx2*-null skin grafted onto nude mice (Rhee et al., 2006). However, these data are quite opposite to the results obtained with *CreER:Lhx2*<sup>fl/fl</sup> mice, in which the *Lhx2* gene is inactivated in adult skin after topical tamoxifen application leading to retardation of anagen development (Tornqvist et al., 2010). It remains to be determined whether timing and/or degree of *Lhx2* inactivation, as well as availability of its co-factors in the skin may contribute to the differences in hair growth phenotype between two genetic models. These data also suggest that the role of *Lhx2* in the control of hair-specific genetic programs in the follicular stem cells is more complex than previously anticipated. Elucidating its precise role in different developmental processes will require further investigations using mice with tissue-specific knockout or overexpression of *Lhx2*.

Interestingly, *Lhx2* protein was not seen in the isthmus and infundibulum of the HFs during wound healing, the areas containing two other stem cell populations expressing *Lgr6* and *Lrig1*, respectively (Jensen et al., 2009; Snippert et al., 2010). Thus, *Lhx2* involvement in the control of *Lgr6*<sup>+</sup> and *Lrig1*<sup>+</sup> stem cell populations is rather unlikely, supporting a concept that several independent mechanisms control the recruitment of the distinct HF stem cell populations to the regenerating epidermis in wounded skin (Ito et al., 2005; Jaks et al., 2008; Jensen et al., 2009; Levy et al., 2005; Levy et al., 2007; Snippert et al., 2010).

Taken together, our data demonstrating that *Lhx2* positively regulates *Sox9* and *Tcf4* and negatively regulates *Lgr5* in the bulge and secondary hair germ progenitor cells, suggest that *Lhx2* operates as a central switchboard controlling the differential response of the distinct HF stem cell populations to wounding. Indeed, by stimulating the expression of *Sox9* and *Tcf4*, *Lhx2* may promote generation of the HF-derived progenitor cells that contribute to regeneration of the epidermis after injury. Instead, by inhibiting *Lgr5* expression, *Lhx2* suppresses stem cell activation for construction of new anagen HF, and thereby HF entry into anagen (Fig. 5D).

Through its dual activity, which includes stimulation of epidermal regeneration on the one hand and inhibition of hair cycling on the other hand, *Lhx2* serves as one of the key regulators in the molecular network that control the response of the HFs to skin injury. Although detailed mechanisms underlying its involvement in reciprocal control of the activity of distinct HF stem cell populations remain to be further defined, these data suggest

that *Lhx2* may serve as a novel target for promoting the production and recruitment of the progenitor cells into regenerating epithelia in conditions associated with an impaired stem cell activity, including ageing and chronic inflammation.

#### Acknowledgements

We thank Dr H. Westphal and Dr P. Koopman for providing *Lhx2*<sup>+/-</sup> mice and Sox9-Luc plasmid, respectively.

#### Funding

This study was supported by the grants from the Biotechnology and Biological Sciences Research Council [BB/E023010/1 to V.A.B.] and from Deutsche Forschungsgemeinschaft [Pa 345/12-2 to R.P.].

#### Competing interests statement

The authors declare no competing financial interests.

#### Supplementary material

Supplementary material available online at <http://dev.biologists.org/lookup/suppl/doi:10.1242/dev.070284/-DC1>

#### References

- Ambler, C. A. and Maatta, A. (2009). Epidermal stem cells: location, potential and contribution to cancer. *J. Pathol.* **217**, 206-216.
- Ansell, D. M., Kloeppe, J. E., Thomason, H. A., Paus, R. and Hardman, M. J. (2011). Exploring the 'hair growth-wound healing connection': anagen phase promotes wound re-epithelization. *J. Invest. Dermatol.* **131**, 512-528.
- Blanpain, C. and Fuchs, E. (2009). Epidermal homeostasis: a balancing act of stem cells in the skin. *Nat. Rev. Mol. Cell Biol.* **10**, 207-217.
- Blanpain, C., Lowry, W. E., Geoghegan, A., Polak, L. and Fuchs, E. (2004). Self-renewal, multipotency, and the existence of two cell populations within an epithelial stem cell niche. *Cell* **118**, 635-648.
- Botchkarev, V. A., Botchkareva, N. V., Roth, W., Nakamura, M., Chen, L.-H., Herzog, W., Lindner, G., McMahon, J. A., Peters, C., Lauster, R. et al. (1999a). Noggin is a mesenchymally-derived stimulator of hair follicle induction. *Nature Cell Biol.* **1**, 158-164.
- Botchkarev, V. A., Peters, E. M., Botchkareva, N. V., Maurer, M. and Paus, R. (1999b). Hair cycle-dependent changes in adrenergic skin innervation, and hair growth modulation by adrenergic drugs. *J. Invest. Dermatol.* **113**, 878-887.
- Botchkarev, N. V., Botchkarev, V. A., Welker, P., Airaksinen, M., Roth, W., Suvanto, P., Muller-Rover, S., Hadshiew, I. M., Peters, C. and Paus, R. (2000). New roles for glial cell line-derived neurotrophic factor and neurturin: involvement in hair cycle control. *Am. J. Pathol.* **156**, 1041-1053.
- Brownell, I., Guevara, E., Bai, C. B., Loomis, C. A. and Joyner, A. L. (2011). Nerve-derived sonic hedgehog defines a niche for hair follicle stem cells capable of becoming epidermal stem cells. *Cell Stem Cell* **8**, 552-565.
- Cartharius, K., Frech, K., Grote, K., Klocke, B., Haltmeier, M., Klingenhoff, A., Frisch, M., Bayerlein, M. and Werner, T. (2005). MatInspector and beyond: promoter analysis based on transcription factor binding sites. *Bioinformatics* **21**, 2933-2942.
- Chmielowiec, J., Borowiak, M., Morkel, M., Stradal, T., Munz, B., Werner, S., Wehland, J., Birchmeier, C. and Birchmeier, W. (2007). c-Met is essential for wound healing in the skin. *J. Cell Biol.* **177**, 151-162.
- Chou, S. J., Perez-Garcia, C. G., Kroll, T. T. and O'Leary, D. D. (2009). *Lhx2* specifies regional fate in *Emx1* lineage of telencephalic progenitors generating cerebral cortex. *Nat. Neurosci.* **12**, 1381-1389.
- Cotsarelis, G. (2006). Epithelial stem cells: a folliculocentric view. *J. Invest. Dermatol.* **126**, 1459-1468.
- Cotsarelis, G., Sun, T. T. and Lavker, R. M. (1990). Label-retaining cells reside in the bulge area of pilosebaceous unit: implications for follicular stem cells, hair cycle, and skin carcinogenesis. *Cell* **61**, 1329-1337.
- Dahl, L., Richter, K., Hagglund, A. C. and Carlsson, L. (2008). *Lhx2* expression promotes self-renewal of a distinct multipotential hematopoietic progenitor cell in embryonic stem cell-derived embryoid bodies. *PLoS One* **3**, e2025.
- DasGupta, R. and Fuchs, E. (1999). Multiple roles for activated LEF/TCF transcription complexes during hair follicle development and differentiation. *Development* **126**, 4557-4568.
- Driskell, R. R., Clavel, C., Rendl, M. and Watt, F. M. (2011). Hair follicle dermal papilla cells at a glance. *J. Cell Sci.* **124**, 1179-1182.
- Frye, M., Fisher, A. G. and Watt, F. M. (2007). Epidermal stem cells are defined by global histone modifications that are altered by Myc-induced differentiation. *PLoS One* **2**, e763.
- Fuchs, E. (2007). Scratching the surface of skin development. *Nature*. **445**, 834-842.
- Garza, L. A., Yang, C. C., Zhao, T., Blatt, H. B., Lee, M., He, H., Stanton, D. C., Carrasco, L., Spiegel, J. H., Tobias, J. W. et al. (2011). Bald scalp in men with androgenetic alopecia retains hair follicle stem cells but lacks CD200-rich and CD34-positive hair follicle progenitor cells. *J. Clin. Invest.* **121**, 613-622.

- Ghazizadeh, S. and Taichman, L. B. (2001). Multiple classes of stem cells in cutaneous epithelium: a lineage analysis of adult mouse skin. *EMBO J* **20**, 1215-1222.
- Gurtner, G. C., Werner, S., Barrandon, Y. and Longaker, M. T. (2008). Wound repair and regeneration. *Nature* **453**, 314-321.
- Hirota, J. and Mombaerts, P. (2004). The LIM-homeodomain protein Lhx2 is required for complete development of mouse olfactory sensory neurons. *Proc. Natl. Acad. Sci. USA* **101**, 8751-8755.
- Hobert, O. and Westphal, H. (2000). Functions of LIM-homeobox genes. *Trends Genet.* **16**, 75-83.
- Horsley, V., Aliprantis, A. O., Polak, L., Glimcher, L. H. and Fuchs, E. (2008). NFATc1 balances quiescence and proliferation of skin stem cells. *Cell* **132**, 299-310.
- Hsu, Y. C., Pasolli, H. A. and Fuchs, E. (2011). Dynamics between stem cells, niche, and progeny in the hair follicle. *Cell* **144**, 92-105.
- Ito, M. and Cotsarelis, G. (2008). Is the hair follicle necessary for normal wound healing? *J. Invest. Dermatol.* **128**, 1059-1061.
- Ito, M., Liu, Y., Yang, Z., Nguyen, J., Liang, F., Morris, R. J. and Cotsarelis, G. (2005). Stem cells in the hair follicle bulge contribute to wound repair but not to homeostasis of the epidermis. *Nat. Med.* **11**, 1351-1354.
- Ito, M., Yang, Z., Andl, T., Cui, C., Kim, N., Millar, S. E. and Cotsarelis, G. (2007). Wnt-dependent de novo hair follicle regeneration in adult mouse skin after wounding. *Nature* **447**, 316-320.
- Jaks, V., Barker, N., Kasper, M., van Es, J. H., Snippert, H. J., Clevers, H. and Toftgård, R. (2008). Lgr5 marks cycling, yet long-lived, hair follicle stem cells. *Nat. Genet.* **40**, 1291-1299.
- Jensen, K. B., Collins, C. A., Nascimento, E., Tan, D. W., Frye, M., Itami, S. and Watt, F. M. (2009). Lig1 expression defines a distinct multipotent stem cell population in mammalian epidermis. *Cell Stem Cell* **4**, 427-439.
- Jensen, U. B., Yan, X., Triel, C., Woo, S. H., Christensen, R. and Owens, D. M. (2008). A distinct population of clonogenic and multipotent murine follicular keratinocytes residing in the upper isthmus. *J. Cell Sci.* **121**, 609-617.
- Kanai, Y. and Koopman, P. (1999). Structural and functional characterization of the mouse Sox9 promoter: implications for campomelic dysplasia. *Hum. Mol. Genet.* **8**, 691-696.
- Kasper, M., Jaks, V., Are, A., Bergström, A., Schwäger, A., Barker, N. and Toftgård, R. (2011). Wounding enhances epidermal tumorigenesis by recruiting hair follicle keratinocytes. *Proc. Natl. Acad. Sci. USA* **108**, 4099-4104.
- Kloepffer, J. E., Tiede, S., Brinckmann, J., Reinhardt, D. P., Meyer, W., Faessler, R. and Paus, R. (2008). Immunophenotyping of the human bulge region: the quest to define useful in situ markers for human epithelial hair follicle stem cells and their niche. *Exp. Dermatol.* **17**, 592-609.
- Kumin, A., Schafer, M., Epp, N., Bugnon, P., Born-Berclaz, C., Oxenius, A., Klippel, A., Bloch, W. and Werner, S. (2007). Peroxiredoxin 6 is required for blood vessel integrity in wounded skin. *J. Cell Biol.* **179**, 747-760.
- Langton, A. K., Herrick, S. E. and Headon, D. J. (2008). An extended epidermal response heals cutaneous wounds in the absence of a hair follicle stem cell contribution. *J. Invest. Dermatol.* **128**, 1311-1318.
- Lau, K., Paus, R., Tiede, S., Day, P. and Bayat, A. (2009). Exploring the role of stem cells in cutaneous wound healing. *Exp. Dermatol.* **18**, 921-933.
- Levy, V., Lindon, C., Harfe, B. D. and Morgan, B. A. (2005). Distinct stem cell populations regenerate the follicle and interfollicular epidermis. *Dev. Cell* **9**, 855-861.
- Levy, V., Lindon, C., Zheng, Y., Harfe, B. D. and Morgan, B. A. (2007). Epidermal stem cells arise from the hair follicle after wounding. *FASEB J.* **21**, 1358-1366.
- Li, L. and Clevers, H. (2010). Coexistence of quiescent and active adult stem cells in mammals. *Science* **327**, 542-545.
- Lu, Z., Hasse, S., Bodo, E., Rose, C., Funk, W. and Paus, R. (2007). Towards the development of a simplified long-term organ culture method for human scalp skin and its appendages under serum-free conditions. *Exp. Dermatol.* **16**, 37-49.
- Mardaryev, A. N., Ahmed, M. I., Vlahov, N. V., Fessing, M. Y., Gill, J. H., Sharov, A. A. and Botchkareva, N. V. (2010). Micro-RNA-31 controls hair cycle-associated changes in gene expression programs of the skin and hair follicle. *FASEB J.* **24**, 3869-3881.
- Merrill, B. J., Gat, U., DasGupta, R. and Fuchs, E. (2001). Tcf3 and Lef1 regulate lineage differentiation of multipotent stem cells in skin. *Genes Dev.* **15**, 1688-1705.
- Moll, I., Houdek, P., Schmidt, H. and Moll, R. (1998). Characterization of epidermal wound healing in a human skin organ culture model: acceleration by transplanted keratinocytes. *J. Invest. Dermatol.* **111**, 251-258.
- Morris, R. J., Liu, Y., Marles, L., Yang, Z., Trempus, C., Li, S., Lin, J. S., Sawicki, J. A. and Cotsarelis, G. (2004). Capturing and profiling adult hair follicle stem cells. *Nat. Biotechnol.* **22**, 411-417.
- Muller-Rover, S., Handjiski, B., van der Veen, C., Eichmüller, S., Foitzik, K., McKay, I. A., Stenn, K. S. and Paus, R. (2001). A comprehensive guide for the accurate classification of murine hair follicles in distinct hair cycle stages. *J. Invest. Dermatol.* **117**, 3-15.
- Nguyen, H., Rendl, M. and Fuchs, E. (2006). Tcf3 governs stem cell features and represses cell fate determination in skin. *Cell* **127**, 171-183.
- Nguyen, H., Merrill, B. J., Polak, L., Nikolova, M., Rendl, M., Shaver, T. M., Pasolli, H. A. and Fuchs, E. (2009). Tcf3 and Tcf4 are essential for long-term homeostasis of skin epithelia. *Nat. Genet.* **41**, 1068-1075.
- Nowak, D. E., Tian, B. and Brasier, A. R. (2005). Two-step cross-linking method for identification of NF-kappaB gene network by chromatin immunoprecipitation. *Biotechniques* **39**, 715-725.
- Nowak, J. A., Polak, L., Pasolli, H. A. and Fuchs, E. (2008). Hair follicle stem cells are specified and function in early skin morphogenesis. *Cell Stem Cell* **3**, 33-43.
- Philpott, M. P., Green, M. R. and Kealey, T. (1990). Human hair growth in vitro. *J. Cell Sci.* **97**, 463-471.
- Porter, F. D., Drago, J., Xu, Y., Cheema, S. S., Wassif, C., Huang, S. P., Lee, E., Grinberg, A., Massalas, J. S., Bodine, D. et al. (1997). Lhx2, a LIM homeobox gene, is required for eye, forebrain, and definitive erythrocyte development. *Development* **124**, 2935-2944.
- Rhee, H., Polak, L. and Fuchs, E. (2006). Lhx2 maintains stem cell character in hair follicles. *Science* **312**, 1946-1949.
- Romagosa, Y., Hu, S. and Kirsner, R. S. (2008). Wound healing without hair. *J. Invest. Dermatol.* **128**, 1058.
- Schafer, M. and Werner, S. (2007). Transcriptional control of wound repair. *Annu. Rev. Cell Dev. Biol.* **23**, 69-92.
- Schmidt-Ullrich, R. and Paus, R. (2005). Molecular principles of hair follicle induction and morphogenesis. *BioEssays* **27**, 247-261.
- Sharov, A. A., Weiner, L., Sharova, T. Y., Siebenhaar, F., Atoyan, R., McNamara, C. A., Funa, K., Gilchrist, B. A., Brissette, J. L. and Botchkarev, V. A. (2003). Noggin overexpression inhibits eyelid opening by altering epidermal apoptosis and differentiation. *EMBO J.* **22**, 2992-3003.
- Sharov, A. A., Fessing, M., Atoyan, R., Sharova, T. Y., Haskell-Luevano, C., Weiner, L., Funa, K., Brissette, J. L., Gilchrist, B. A. and Botchkarev, V. A. (2005). Bone morphogenetic protein (BMP) signaling controls hair pigmentation by means of cross-talk with the melanocortin receptor-1 pathway. *Proc. Natl. Acad. Sci. USA* **102**, 93-98.
- Sharov, A. A., Sharova, T. Y., Mardaryev, A. N., Tommasi di Vignano, A., Atoyan, R., Weiner, L., Yang, S., Brissette, J. L., Dotto, G. P. and Botchkarev, V. A. (2006). BMP signaling regulates size of the hair follicles and modulates the expression of cell cycle-associated genes. *Proc. Natl. Acad. Sci. USA* **103**, 18166-18171.
- Snippert, H. J., Haegebarth, A., Kasper, M., Jaks, V., van Es, J. H., Barker, N., van de Wetering, M., van den Born, M., Begthel, H., Vries, R. G. et al. (2010). Lgr6 marks stem cells in the hair follicle that generate all cell lineages of the skin. *Science* **327**, 1385-1389.
- Taylor, G., Lehrer, M. S., Jensen, P. J., Sun, T. T. and Lavker, R. M. (2000). Involvement of follicular stem cells in forming not only the follicle but also the epidermis. *Cell* **102**, 451-461.
- Tetreault, N., Champagne, M. P. and Bernier, G. (2009). The LIM homeobox transcription factor Lhx2 is required to specify the retina field and synergistically cooperates with Pax6 for Six6 trans-activation. *Dev. Biol.* **327**, 541-550.
- Tiede, S. and Paus, R. (2006). Lhx2-decisive role in epithelial stem cell maintenance, or just the 'tip of the iceberg'? *BioEssays* **28**, 1157-1160.
- Tornqvist, G., Sandberg, A., Hagglund, A. C. and Carlsson, L. (2010). Cyclic expression of Lhx2 regulates hair formation. *PLoS Genet.* **6**, e1000904.
- Trempus, C. S., Morris, R. J., Ehinger, M., Elmore, A., Bortner, C. D., Ito, M., Cotsarelis, G., Nijhof, J. G., Peckham, J., Flagler, N. et al. (2007). CD34 expression by hair follicle stem cells is required for skin tumor development in mice. *Cancer Res.* **67**, 4173-4181.
- Tumbar, T., Guasch, G., Greco, V., Blanpain, C., Lowry, W. E., Rendl, M. and Fuchs, E. (2003). Defining the epithelial stem cell niche in skin. *Science* **303**, 359-363.
- Watt, F. M. and Jensen, K. B. (2009). Epidermal stem cell diversity and quiescence. *EMBO Mol. Med.* **1**, 260-267.
- Xu, X., Mannik, J., Kudryavtseva, E., Lin, K. K., Flanagan, L. A., Spencer, J., Soto, A., Wang, N., Lu, Z., Yu, Z. et al. (2007). Co-factors of LIM domains (Clms/Ldb/Nli) regulate corneal homeostasis and maintenance of hair follicle stem cells. *Dev. Biol.* **312**, 484-500.
- Yun, S., Saijoh, Y., Hirokawa, K. E., Kopinke, D., Murtaugh, L. C., Monuki, E. S. and Levine, E. M. (2009). Lhx2 links the intrinsic and extrinsic factors that control optic cup formation. *Development* **136**, 3895-3906.
